# Supplementary material for: Mn mixed oxide catalysts supported on Sn-doped CoAl-LDO for low-temperature NH3-SCR
Source: Royal Society of Chemistry journal article supplement (doi:10.1039/d3cy00272a), 2023-01-01
Supplement: d3cy00272a1.pdf [file d3cy00272a1.pdf]

## Supporting Information

### **Mn mixed oxide catalysts supported on Sn-doped CoAl- LDO for low-temperature NH<sub>3</sub>-SCR**

Hange Wang<sup>a</sup>, Wen Chen<sup>a</sup>, Wei Jin<sup>a</sup>, Yueli Liu<sup>a, b, \*</sup>

<sup>a</sup> State Key Laboratory of Silicate Materials for Architectures, School of Materials Science and Engineering, Wuhan University of Technology, Wuhan, 430070, P. R. China

<sup>b</sup> Shenzhen Research Institute of Wuhan University of Technology, Shenzhen, 518000, P. R. China

[\*] Correspondent:

Prof. Yueli LIU

Tel.: +86-27-87760159

Fax: +86-27-87760129

E-mail: [lylliuwhut@whut.edu.cn](mailto:lylliuwhut@whut.edu.cn) (Yueli LIU)

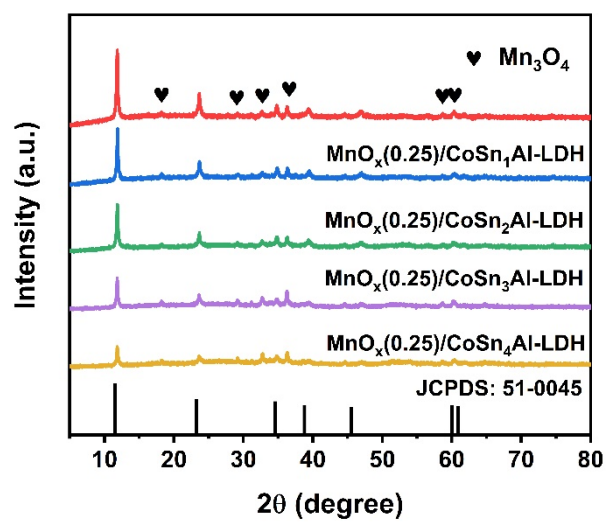

**Figure S1.** XRD patterns of  $\text{MnO}_x(0.25)/\text{CoSn}_n\text{Al-LDH}$  precursors ( $x=0, 1, 2, 3, 4$ ).

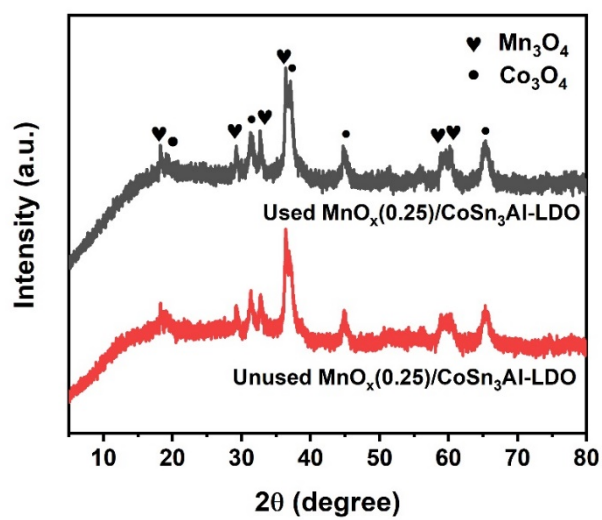

**Figure S2.** XRD patterns of the used and unused  $\text{MnO}_x(0.25)/\text{CoSn}_3\text{Al-LDO}$  catalysts.

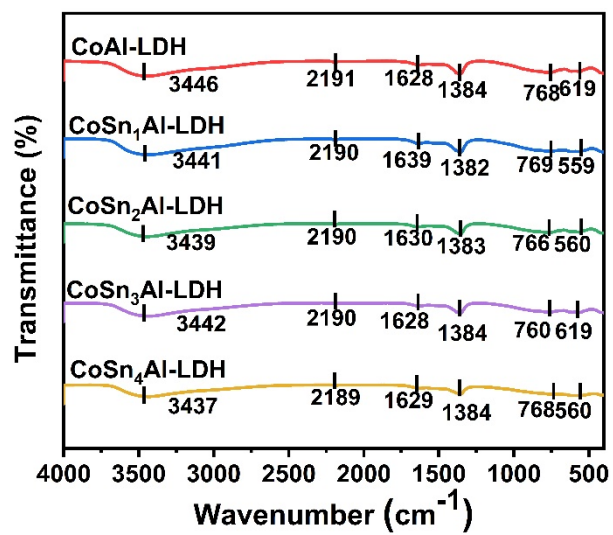

**Figure S3.** FT-IR spectra of CoSn<sub>n</sub>Al-LDH (x=0, 1, 2, 3, 4).

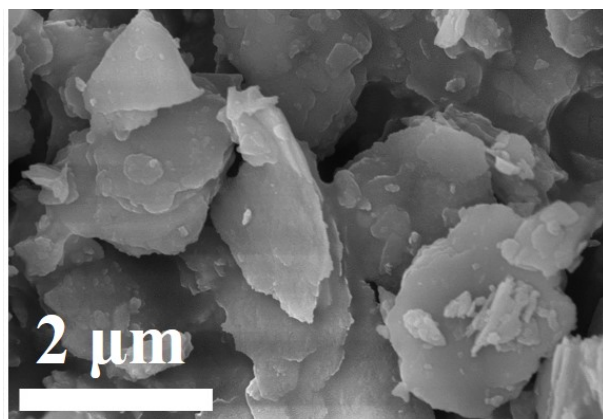

**Figure S4.** SEM image of CoSn<sub>3</sub>Al-LDH.

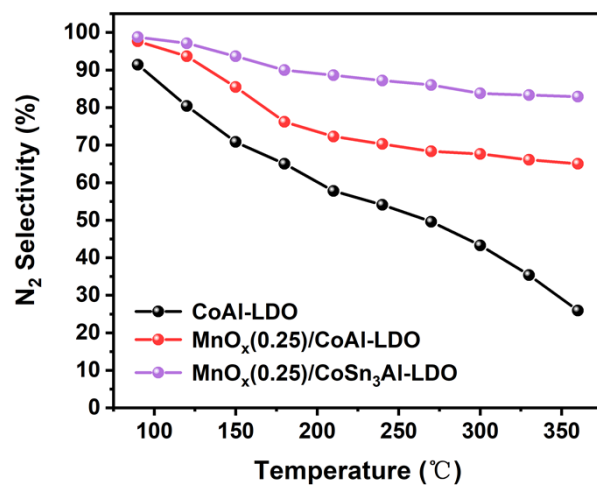

**Figure S5.** N<sub>2</sub> selectivity of various catalysts. Reaction conditions: [NO]=[NH<sub>3</sub>]=500 ppm, [O<sub>2</sub>]=3 vol.%, GHSV=30,000 h<sup>-1</sup> and N<sub>2</sub> as balance.

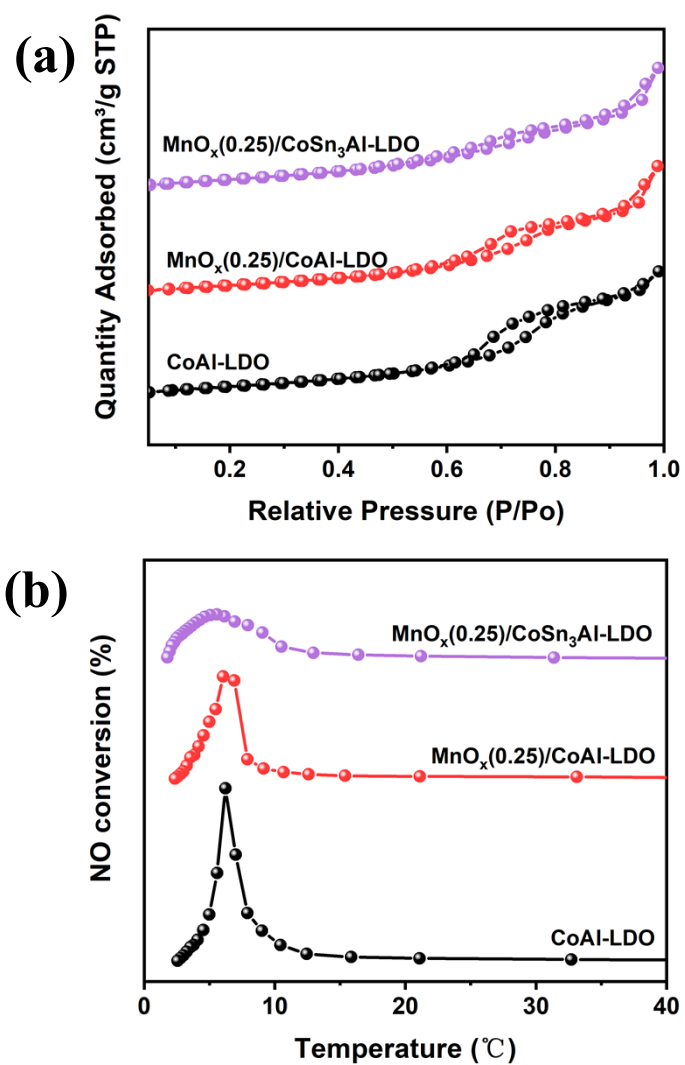

**Figure S6.** (a)  $\text{N}_2$  adsorption-desorption isotherms and (b) pore diameter distribution of various catalysts.

**Table S1.** Summary of textual parameters of the various samples.

| Samples                           | Specific area<br>(m <sup>2</sup> /g) | Pore volume<br>(cm <sup>3</sup> /g) | Average pore<br>diameter (nm) |
|-----------------------------------|--------------------------------------|-------------------------------------|-------------------------------|
| CoAl-LDO                          | 122.83                               | 0.31                                | 6.21                          |
| Mn(0.25)/CoAl-LDO                 | 110.35                               | 0.32                                | 6.03                          |
| Mn(0.25)/CoSn <sub>3</sub> Al-LDO | 120.14                               | 0.30                                | 5.56                          |
